# Supplementary material
Source: PubMed Central journal article supplement (PMC11626272)
Supplement: ajcr0014-5116-f11.pdf [file ajcr0014-5116-f11.pdf]

An anoiakis-related gene signature predicts prognosis acute myeloid leukemia

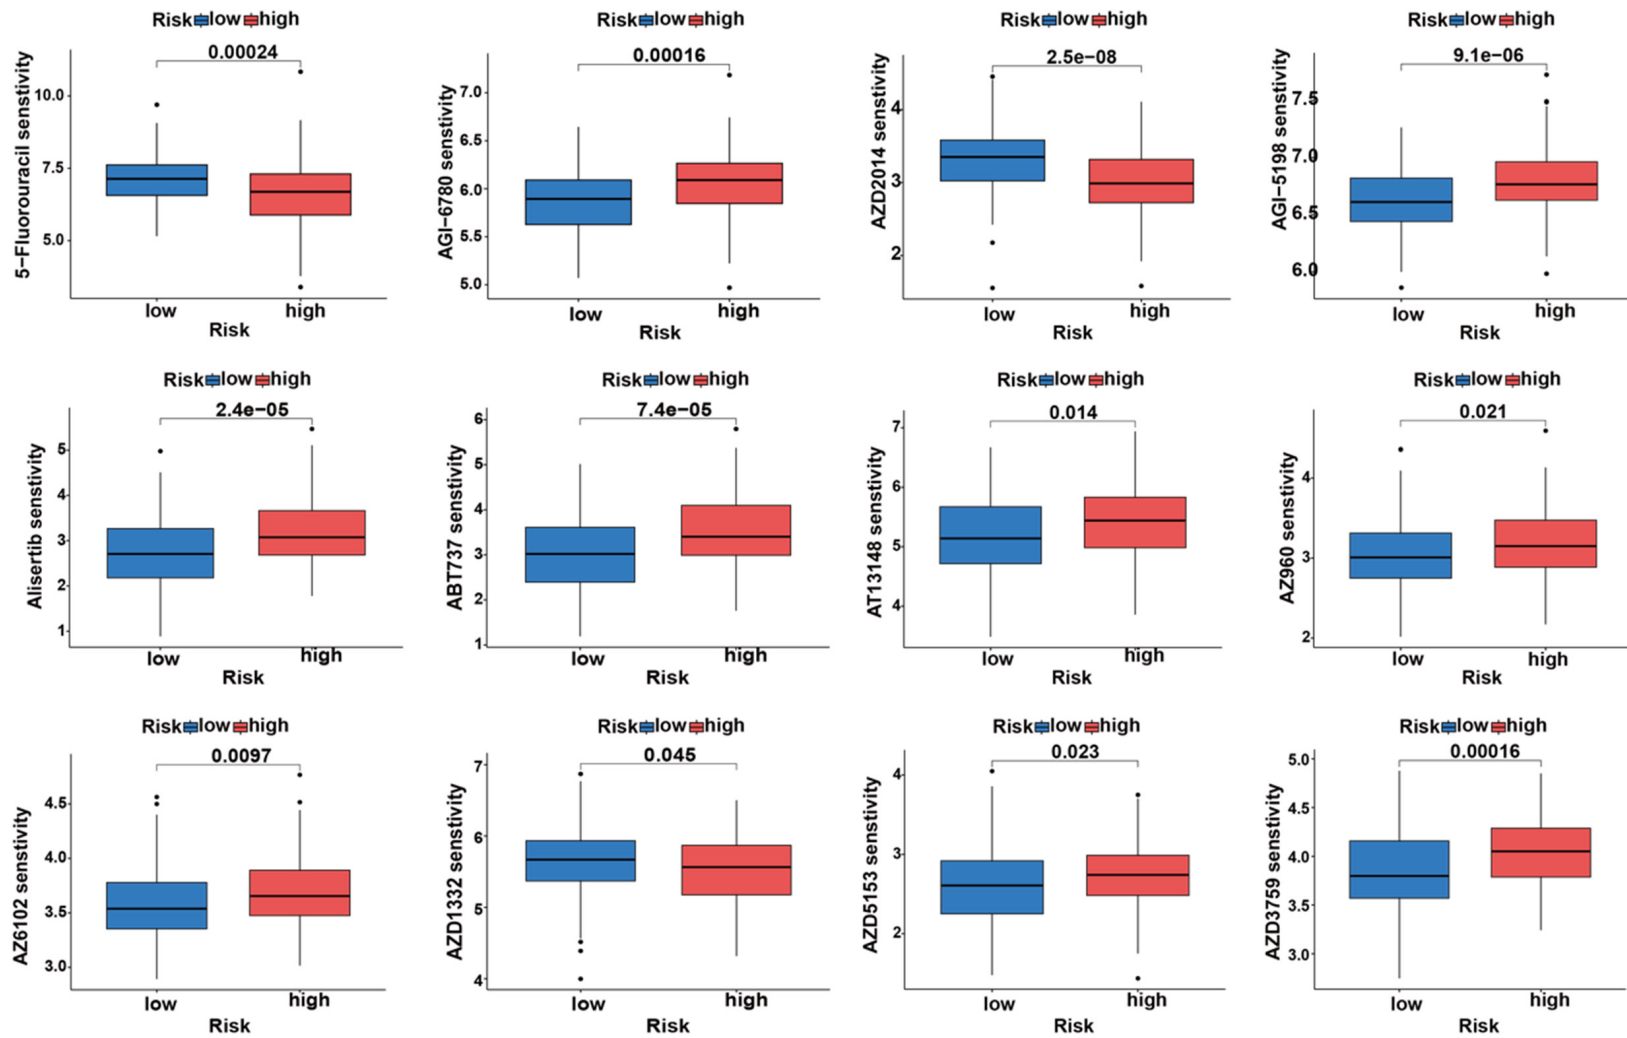

Figure S1. Determination of new promising compounds targeting ANRGs.

# An anoikis-related gene signature predicts prognosis acute myeloid leukemia

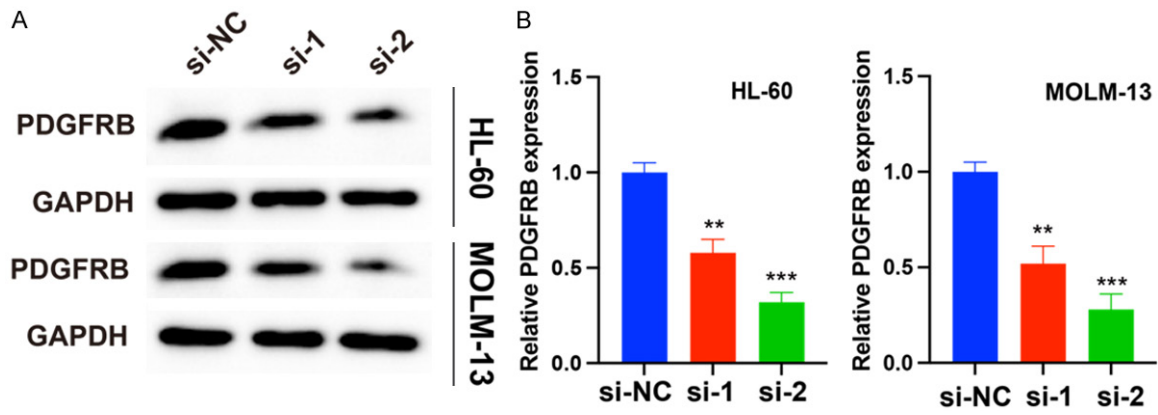

**Figure S2.** Relative protein (S2A) and mRNA (S2B) levels of PDGFRB in HL-60 and MOLM-13 cells transfected with PDGFRB knockdown (siRNA-#1 and siRNA-#2). Data are shown as mean  $\pm$  SD of three independent experiments. \*\* $P < 0.01$ , \*\*\* $P < 0.001$ . NC, negative control.
